# Supplementary material for: Towards Balanced Strength and Plasticity in Graphene-Nickel Composites: The Role of Graphene, Bimodal Metal Powder and Processing Conditions
Source: MDPI journal article supplement (doi:10.3390/met13061037), 2023-05-29
Supplement: s1 [file s1]

# Towards Balanced Strength and Plasticity in Graphene-Nickel Composites: The Role of Graphene, Bimodal Metal Powder and Processing Conditions

Olga Yu. Kurapova <sup>1,2,\*</sup>, Ivan V. Smirnov <sup>2</sup>, Ivan Yu. Archakov <sup>3</sup>, Chao Chen <sup>4</sup> and Vladimir G. Konakov <sup>1,3</sup>

<sup>1</sup> Laboratory of Mechanics of Novel Nanomaterials, Institute of Advanced Manufacturing Technologies, Peter the Great St. Petersburg Polytechnic University, Politechnicheskaya str. 29, St. Petersburg 195251, Russia; vgkonakov@yandex.ru

<sup>2</sup> Saint Petersburg State University, Universitetskaya emb. 7/9, St. Petersburg 199034, Russia; i.v.smirnov@spbu.ru

<sup>3</sup> Mechanics of Nanomaterials and Theory of Defects, Institute for Problems of Mechanical Engineering, Russian Academy of Sciences, Bolshoy pr. 61, St. Petersburg 199178, Russia; ivan.archakov@gmail.com

<sup>4</sup> State Key Laboratory of Powder Metallurgy, Central South University, Changsha 410083, China; pkhchenchao@csu.edu.cn

\* Correspondence: o.y.kurapova@spbu.ru

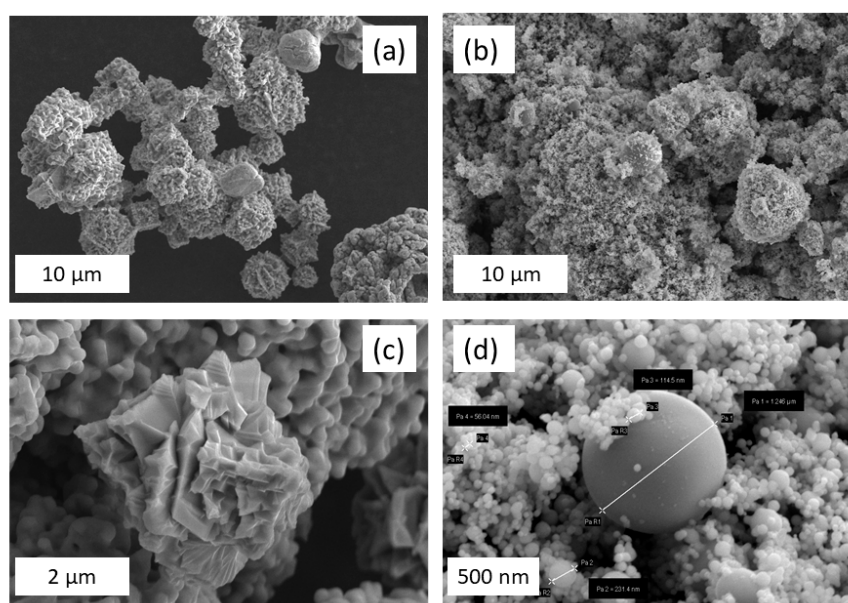

**Figure S1.** Microstructures of starting nickel powders: (a) and (b) micron-sized nickel powder; (c) and (d) nano-sized nickel powder.

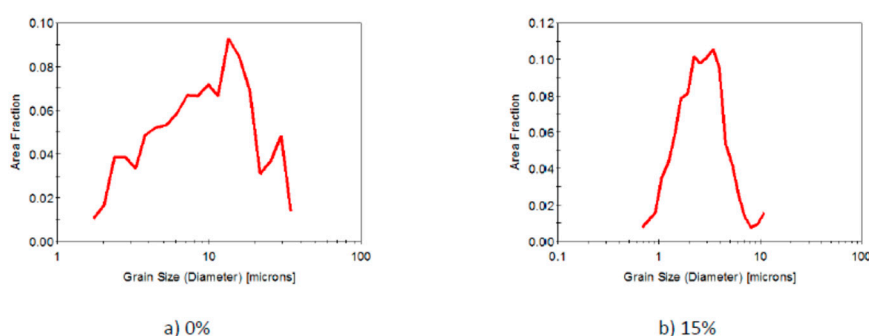

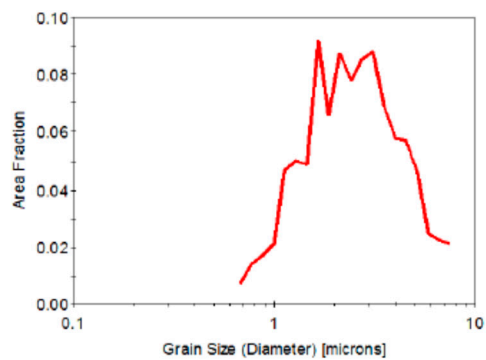

c) 35%

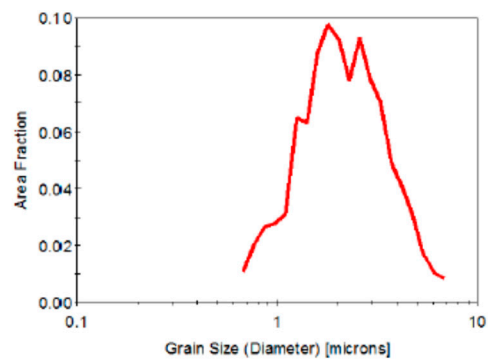

d) 50%

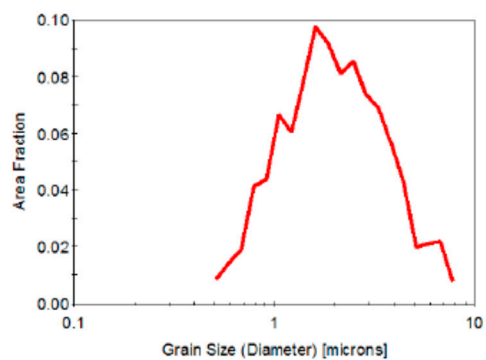

e) 65%

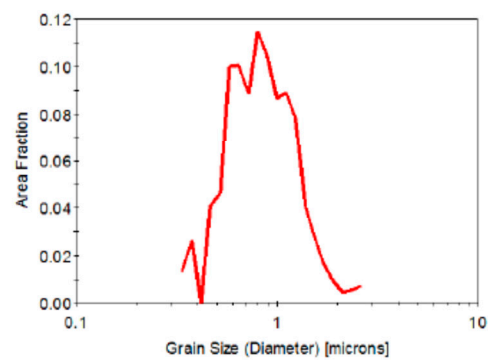

f) 85%

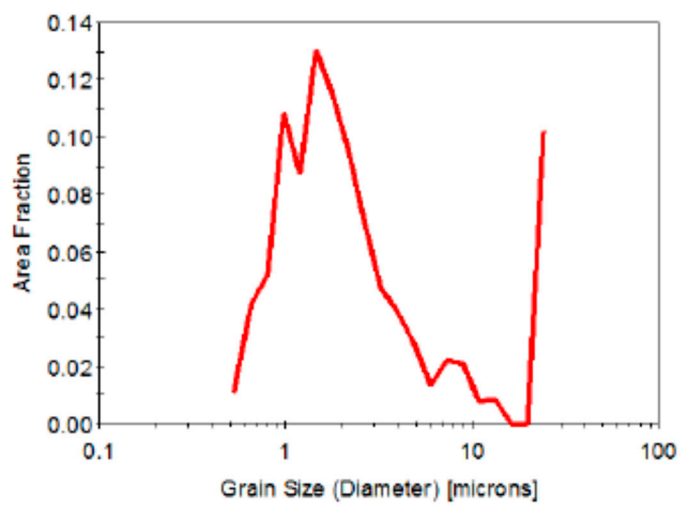

g) 100%

**Figure S2.** Grain size distribution in (a) 100mNi, (b) 15nNi, (c) 35nNi, (d) 50 nNi, (e) 65nNi, (f) 85nNi (g) 100nNi.
